# Supplementary material
Source: publisher figshare collection journal article supplement (https://gsajournals.figshare.com/articles/dataset/_/8267861)

Derived mutations from the AB node

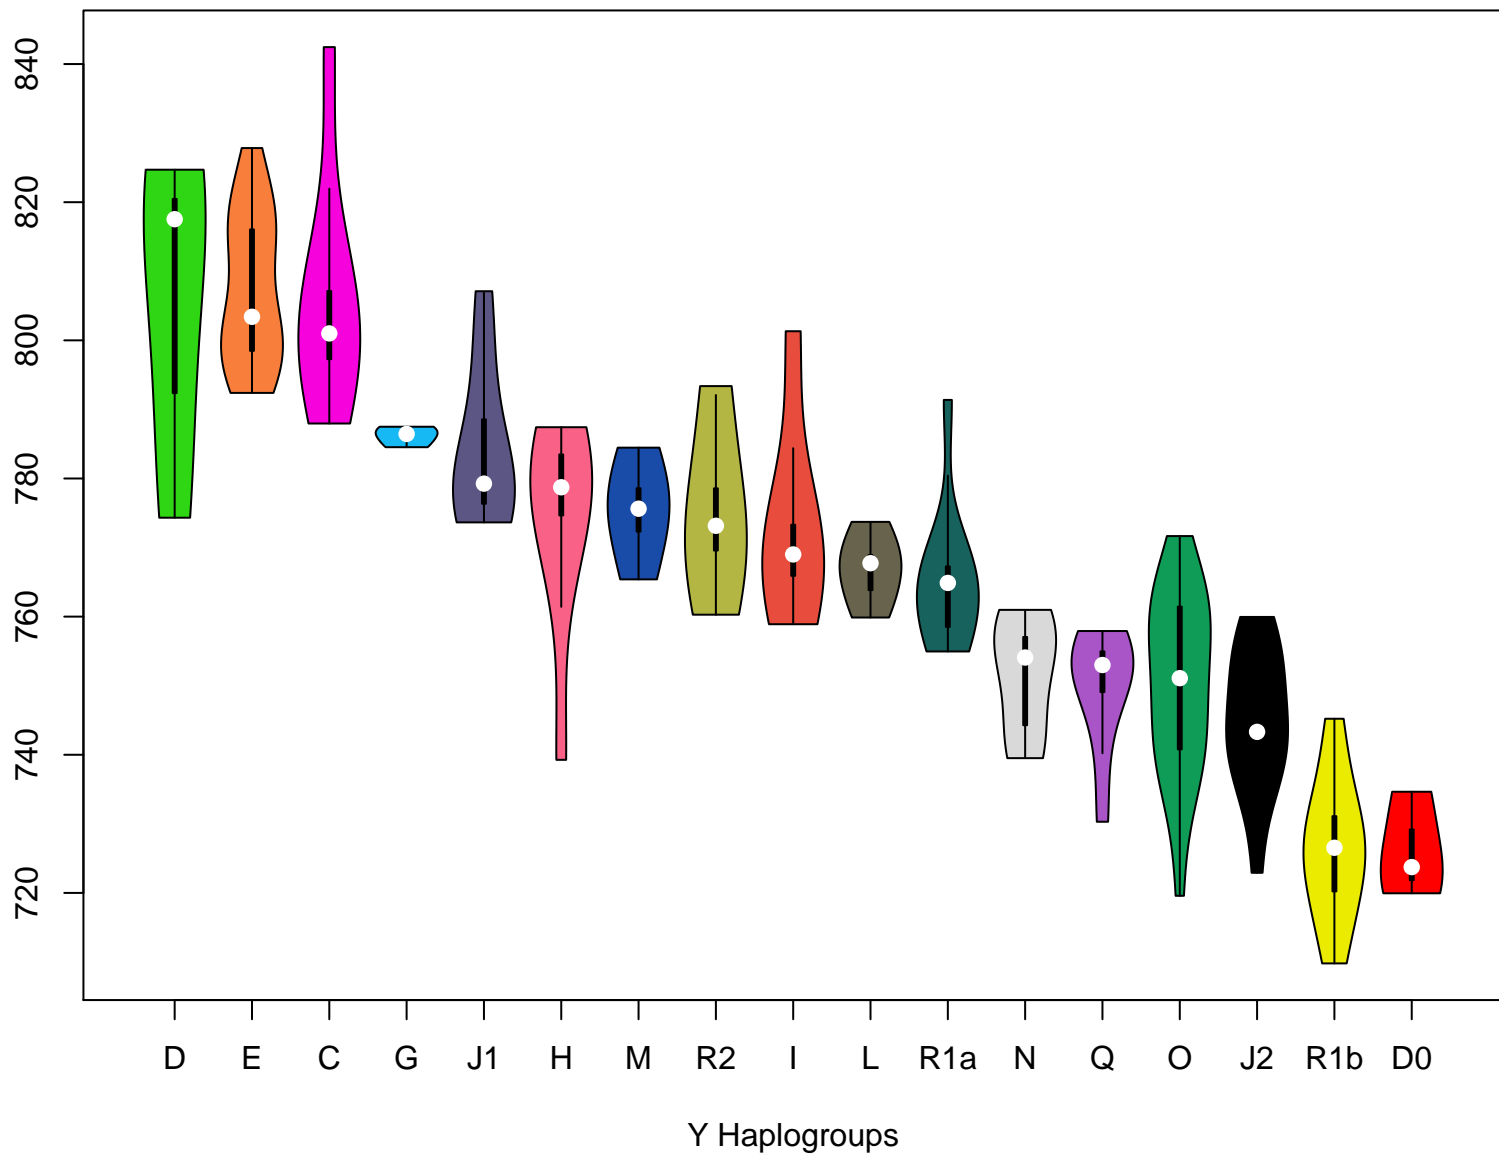

Supplement: Supplementary file 1 [file 1]
